# Supplementary material for: Awareness of Racial and Ethnic Bias and Potential Solutions to Address Bias With Use of Health Care Algorithms
Source: PubMed Central journal article supplement (PMC10238944; doi:10.1001/jamahealthforum.2023.1197), 2023-06-02
Supplement: jamahealthforum-e231197-s001.pdf [file jamahealthforum-e231197-s001.pdf]

## Data Sharing Statement

Jain. Awareness of Racial and Ethnic Bias and Potential Solutions to Address Bias With Use of Health Care Algorithms. *JAMA Health Forum*. Published June 02, 2023.

doi:10.1001/jamahealthforum.2023.1197

### Data

**Data available:** Yes

**Data types:** Other (please specify)

**Additional Information:** Qualitative data will be made available upon request.

**How to access data:** [anjali.jain@ahrq.hhs.gov](mailto:anjali.jain@ahrq.hhs.gov)

**When available:** With publication

### Supporting Documents

**Document types:** None

### Additional Information

**Who can access the data:** Those who request the data using Agency for Healthcare Research and Quality (AHRQ) procedures and receiving AHRQ approval.

**Types of analyses:** TBD

**Mechanisms of data availability:** Without investigator support, using AHRQ procedures and receiving AHRQ approval.
